# Supplementary material for: Multidimensional Analyses of Tumor Immune Microenvironment Reveal the Possible Rationality of Immunotherapy and Identify High Immunotherapy Response Subtypes for Renal Papillary Cell Carcinoma
Source: Front Immunol. 2021 Aug 31;12:657951. doi: 10.3389/fimmu.2021.657951 (PMC8438207; doi:10.3389/fimmu.2021.657951)
Supplement: Supplementary file 5 [file Table_3.xlsx]

## Sheet: Sheet1
Patient	TIDE	Dysfunction	Exclusion
TCGA-UZ-A9PS	-1.03	-1.03	0.7
TCGA-G7-6789	1.85	-0.99	1.85
TCGA-AL-3467	1.72	-1.57	1.72
TCGA-B9-5155	1.62	-1.41	1.62
TCGA-P4-AAVL	1.57	-1	1.57
TCGA-AL-3466	1.56	-1.68	1.56
TCGA-UZ-A9PQ	1.54	-1.44	1.54
TCGA-BQ-5887	1.54	-0.91	1.54
TCGA-AL-7173	1.53	-1	1.53
TCGA-G7-A8LE	1.53	-1.08	1.53
TCGA-GL-6846	1.52	-1.2	1.52
TCGA-4A-A93W	1.51	-1.13	1.51
TCGA-P4-A5E8	1.49	-1.18	1.49
TCGA-DW-7842	1.49	-1.23	1.49
TCGA-B9-A44B	1.48	-1.08	1.48
TCGA-G7-A8LD	1.47	-1.32	1.47
TCGA-2Z-A9J7	1.46	-1.29	1.46
TCGA-B1-A654	1.44	-0.92	1.44
TCGA-BQ-5879	1.44	-1.11	1.44
TCGA-A4-A5Y0	1.43	-1.45	1.43
TCGA-BQ-5877	1.42	-1.07	1.42
TCGA-UN-AAZ9	1.41	-1.13	1.41
TCGA-J7-A8I2	1.39	-1.03	1.39
TCGA-G7-A8LC	1.39	-1.1	1.39
TCGA-2Z-A9JS	1.39	-1.22	1.39
TCGA-SX-A71W	1.38	-1.13	1.38
TCGA-2Z-A9JJ	1.38	-1.06	1.38
TCGA-P4-A5E7	1.38	-1.11	1.38
TCGA-MH-A854	1.38	-0.95	1.38
TCGA-AT-A5NU	1.38	-1.09	1.38
TCGA-5P-A9JV	1.37	-0.97	1.37
TCGA-G7-6797	1.36	-1.08	1.36
TCGA-A4-8311	1.36	-1.24	1.36
TCGA-AL-3471	1.36	-1.39	1.36
TCGA-GL-A9DC	1.32	-1.22	1.32
TCGA-2Z-A9JO	1.31	-1.21	1.31
TCGA-UZ-A9PZ	1.31	-1.09	1.31
TCGA-2Z-A9JQ	1.3	-1.03	1.3
TCGA-PJ-A5Z9	1.29	-1.11	1.29
TCGA-G7-A4TM	1.28	-0.96	1.28
TCGA-Q2-A5QZ	1.28	-0.85	1.28
TCGA-B3-3926	1.27	-1.13	1.27
TCGA-GL-A59R	1.27	-1.14	1.27
TCGA-BQ-7053	1.27	-1.08	1.27
TCGA-A4-8515	1.27	-1.32	1.27
TCGA-A4-A5Y1	1.27	-1.23	1.27
TCGA-IA-A83V	1.26	-0.76	1.26
TCGA-BQ-7055	1.25	-1.26	1.25
TCGA-B3-4103	1.25	-1.22	1.25
TCGA-MH-A856	1.25	-1.08	1.25
TCGA-J7-6720	1.24	-1.07	1.24
TCGA-5P-A9K2	1.24	-1.14	1.24
TCGA-SX-A7SS	1.22	-1.14	1.22
TCGA-2Z-A9JG	1.22	-1.17	1.22
TCGA-P4-AAVK	1.22	-1.2	1.22
TCGA-UZ-A9PR	1.22	-1.22	1.22
TCGA-SX-A7SU	1.22	-1.02	1.22
TCGA-B3-A6W5	1.22	-1.12	1.22
TCGA-B1-A47O	1.21	-0.99	1.21
TCGA-B9-4115	1.21	-1.3	1.21
TCGA-2Z-A9JN	1.21	-1.17	1.21
TCGA-BQ-5875	1.2	-1.31	1.2
TCGA-BQ-5883	1.2	-1.12	1.2
TCGA-B9-5156	1.2	-1.07	1.2
TCGA-BQ-7044	1.2	-1.23	1.2
TCGA-A4-7732	1.19	-1.24	1.19
TCGA-5P-A9K6	1.19	-1.07	1.19
TCGA-B1-7332	1.18	-1.03	1.18
TCGA-P4-AAVM	1.18	-1.32	1.18
TCGA-P4-A5E6	1.17	-0.99	1.17
TCGA-A4-8098	1.16	-1.12	1.16
TCGA-P4-A5EB	1.16	-1.22	1.16
TCGA-BQ-5885	1.16	-1.13	1.16
TCGA-SX-A7SO	1.15	-1.29	1.15
TCGA-AL-3468	1.14	-1.25	1.14
TCGA-B9-4617	1.14	-1.11	1.14
TCGA-MH-A561	1.13	-0.95	1.13
TCGA-2Z-A9JM	1.13	-0.95	1.13
TCGA-DW-7840	1.13	-0.92	1.13
TCGA-SX-A71U	1.12	-1.12	1.12
TCGA-DW-5561	1.12	-1.04	1.12
TCGA-GL-A59T	1.12	-1.13	1.12
TCGA-G7-6790	1.12	-1.09	1.12
TCGA-5P-A9JZ	1.12	-1.13	1.12
TCGA-5P-A9KE	1.12	-1.18	1.12
TCGA-4A-A93X	1.11	-1.43	1.11
TCGA-SX-A71R	1.11	-1.06	1.11
TCGA-UZ-A9PK	1.11	-1.09	1.11
TCGA-BQ-5888	1.1	-0.87	1.1
TCGA-DZ-6132	1.09	-0.79	1.09
TCGA-IZ-A6M9	1.09	-0.88	1.09
TCGA-A4-A772	1.08	-0.99	1.08
TCGA-5P-A9JW	1.08	-1.09	1.08
TCGA-DZ-6134	1.07	-0.8	1.07
TCGA-IA-A83W	1.07	-0.92	1.07
TCGA-UZ-A9Q1	1.07	-1.3	1.07
TCGA-5P-A9K3	1.07	-1.32	1.07
TCGA-2Z-A9JP	1.07	-1.04	1.07
TCGA-HE-A5NI	1.06	-0.96	1.06
TCGA-BQ-7045	1.06	-1	1.06
TCGA-B9-4117	1.06	-1.03	1.06
TCGA-Y8-A897	1.06	-1.06	1.06
TCGA-A4-7996	1.05	-1.15	1.05
TCGA-5P-A9K0	1.05	-1.14	1.05
TCGA-2Z-A9J1	1.05	-0.95	1.05
TCGA-MH-A55Z	1.05	-1.01	1.05
TCGA-UZ-A9PU	1.05	-1.22	1.05
TCGA-5P-A9K8	1.04	-1.25	1.04
TCGA-MH-A55W	1.04	-1.03	1.04
TCGA-B3-3925	1.03	-1.12	1.03
TCGA-SX-A71V	1.02	-1.15	1.02
TCGA-A4-7286	1.02	-0.85	1.02
TCGA-A4-8517	1.01	-1.13	1.01
TCGA-B9-A8YI	0.99	-1.3	0.99
TCGA-SX-A7SR	0.98	-1.07	0.98
TCGA-Y8-A896	0.98	-0.82	0.98
TCGA-A4-7583	0.98	-1	0.98
TCGA-BQ-7062	0.98	-0.82	0.98
TCGA-SX-A7SN	0.98	-1.02	0.98
TCGA-IA-A40X	0.98	-1.06	0.98
TCGA-A4-A6HP	0.97	-0.84	0.97
TCGA-UZ-A9PO	0.97	-1.12	0.97
TCGA-UZ-A9Q0	0.96	-1.02	0.96
TCGA-HE-A5NF	0.94	-0.94	0.94
TCGA-IZ-A6M8	0.93	-0.92	0.93
TCGA-WN-AB4C	0.91	-1.13	0.91
TCGA-V9-A7HT	0.89	-0.95	0.89
TCGA-BQ-7059	0.87	-0.77	0.87
TCGA-HE-A5NL	0.83	-0.96	0.83
TCGA-B9-A5W8	0.81	-0.85	0.81
TCGA-5P-A9KH	0.8	-1.13	0.8
TCGA-P4-A5EA	-0.68	-0.68	1.27
TCGA-B1-A656	-0.69	-0.69	1.04
TCGA-G7-6795	-0.79	-0.79	1.07
TCGA-2K-A9WE	-0.8	-0.8	0.8
TCGA-BQ-5881	-0.81	-0.81	0.96
TCGA-GL-A4EM	-0.82	-0.82	1.11
TCGA-MH-A562	-0.85	-0.85	1
TCGA-B9-A69E	-0.88	-0.88	0.95
TCGA-UZ-A9PM	-0.88	-0.88	0.97
TCGA-A4-A7UZ	-0.9	-0.9	1.24
TCGA-J7-8537	-0.93	-0.93	1.24
TCGA-F9-A7Q0	-0.95	-0.95	1.24
TCGA-BQ-5894	-0.95	-0.95	1.68
TCGA-MH-A855	-0.96	-0.96	1.13
TCGA-BQ-5880	-0.97	-0.97	1.29
TCGA-F9-A7VF	-1.01	-1.01	1.3
TCGA-BQ-5882	-1.02	-1.02	1.22
TCGA-A4-7287	-1.03	-1.03	1.51
TCGA-2Z-A9J2	-1.05	-1.05	1.08
TCGA-F9-A4JJ	-1.19	-1.19	1.45
TCGA-F9-A8NY	-1.21	-1.21	1.39
TCGA-GL-7966	1.75	-1.46	1.75
TCGA-G7-6793	1.7	-1.09	1.7
TCGA-UZ-A9PN	1.67	-1.03	1.67
TCGA-DW-7839	1.64	-1.45	1.64
TCGA-DW-7836	1.63	-1.22	1.63
TCGA-Y8-A894	1.59	-1.33	1.59
TCGA-B3-4104	1.58	-1.2	1.58
TCGA-HE-A5NJ	1.58	-1.2	1.58
TCGA-IA-A40Y	1.56	-1.27	1.56
TCGA-BQ-5893	1.55	-1.27	1.55
TCGA-BQ-7056	1.54	-1.25	1.54
TCGA-IZ-8196	1.53	-1.28	1.53
TCGA-IZ-8195	1.51	-1.37	1.51
TCGA-UZ-A9PP	1.5	-1.11	1.5
TCGA-2Z-A9JE	1.49	-1.24	1.49
TCGA-EV-5902	1.49	-1.26	1.49
TCGA-B9-A5W9	1.48	-1.31	1.48
TCGA-SX-A7SL	1.48	-1.27	1.48
TCGA-5P-A9K9	1.48	-1.2	1.48
TCGA-P4-AAVO	1.47	-1.35	1.47
TCGA-A4-7828	1.46	-0.95	1.46
TCGA-G7-7501	1.44	-1.36	1.44
TCGA-BQ-5891	1.43	-1.34	1.43
TCGA-UZ-A9PV	1.42	-1.34	1.42
TCGA-A4-7734	1.4	-1.05	1.4
TCGA-SX-A7SQ	1.4	-1.24	1.4
TCGA-UZ-A9PJ	1.39	-1.29	1.39
TCGA-BQ-7049	1.39	-0.86	1.39
TCGA-BQ-7058	1.39	-1.2	1.39
TCGA-EV-5903	1.39	-0.91	1.39
TCGA-BQ-5876	1.37	-1.53	1.37
TCGA-2Z-A9J3	1.36	-1.31	1.36
TCGA-B9-4116	1.35	-1.19	1.35
TCGA-UZ-A9PL	1.35	-1.12	1.35
TCGA-GL-7773	1.35	-1.04	1.35
TCGA-SX-A7SM	1.35	-1.19	1.35
TCGA-A4-7288	1.34	-1.27	1.34
TCGA-G7-A8LB	1.34	-1.27	1.34
TCGA-2Z-A9JK	1.33	-0.93	1.33
TCGA-DW-5560	1.33	-1	1.33
TCGA-BQ-5878	1.32	-1.19	1.32
TCGA-AL-3472	1.32	-1.08	1.32
TCGA-BQ-7061	1.32	-1.14	1.32
TCGA-DZ-6133	1.32	-1.21	1.32
TCGA-A4-8310	1.31	-1.28	1.31
TCGA-2Z-A9J9	1.31	-1.07	1.31
TCGA-Y8-A8S0	1.3	-1.21	1.3
TCGA-B9-7268	1.3	-1.22	1.3
TCGA-B1-A47M	1.3	-0.99	1.3
TCGA-SX-A71S	1.3	-1.11	1.3
TCGA-5P-A9K4	1.3	-1.26	1.3
TCGA-A4-A57E	1.27	-1.31	1.27
TCGA-O9-A75Z	1.27	-1.05	1.27
TCGA-B1-A47N	1.27	-0.96	1.27
TCGA-A4-7584	1.26	-1.37	1.26
TCGA-EV-5901	1.26	-0.82	1.26
TCGA-BQ-5886	1.25	-1.25	1.25
TCGA-GL-8500	1.23	-1.23	1.23
TCGA-BQ-7048	1.23	-1.12	1.23
TCGA-5P-A9JU	1.22	-1.28	1.22
TCGA-A4-8630	1.22	-1.32	1.22
TCGA-BQ-7050	1.21	-1.21	1.21
TCGA-MH-A560	1.2	-1.16	1.2
TCGA-HE-A5NH	1.19	-1.21	1.19
TCGA-A4-A5DU	1.18	-1.1	1.18
TCGA-BQ-7051	1.17	-1.34	1.17
TCGA-A4-8518	1.17	-1.16	1.17
TCGA-2Z-A9JD	1.17	-1.27	1.17
TCGA-G7-6792	1.16	-1.06	1.16
TCGA-Y8-A8RZ	1.15	-1.18	1.15
TCGA-G7-7502	1.14	-1.01	1.14
TCGA-IA-A40U	1.14	-1.03	1.14
TCGA-5P-A9KF	1.14	-1.14	1.14
TCGA-IA-A83S	1.13	-1.09	1.13
TCGA-2Z-A9J8	1.13	-1.29	1.13
TCGA-A4-A4ZT	1.12	-1.06	1.12
TCGA-5P-A9KA	1.12	-0.94	1.12
TCGA-BQ-5890	1.11	-1.22	1.11
TCGA-Y8-A895	1.11	-1.18	1.11
TCGA-SX-A7SP	1.09	-1.03	1.09
TCGA-DW-7963	1.09	-1.11	1.09
TCGA-A4-8312	1.07	-1.15	1.07
TCGA-HE-A5NK	1.06	-0.88	1.06
TCGA-2Z-A9JL	1.06	-1.02	1.06
TCGA-A4-7997	1.05	-1.19	1.05
TCGA-KV-A74V	1.05	-1.06	1.05
TCGA-DW-7837	1.05	-1.09	1.05
TCGA-B9-A8YH	1.05	-1.07	1.05
TCGA-DW-7838	1.04	-0.99	1.04
TCGA-F9-A97G	1.04	-1.2	1.04
TCGA-UZ-A9PX	1.04	-1.08	1.04
TCGA-DZ-6135	1.03	-0.96	1.03
TCGA-B9-A5W7	1.03	-1.11	1.03
TCGA-2Z-A9J6	1.03	-1.07	1.03
TCGA-BQ-7060	1.03	-1.06	1.03
TCGA-B1-A657	1.02	-1.04	1.02
TCGA-5P-A9KC	1.02	-1.1	1.02
TCGA-2Z-A9JR	1.02	-1	1.02
TCGA-A4-8516	1.02	-1.12	1.02
TCGA-A4-A5XZ	1.01	-1.12	1.01
TCGA-BQ-7046	1.01	-1.05	1.01
TCGA-5P-A9JY	1	-1.15	1
TCGA-Y8-A898	0.98	-0.91	0.98
TCGA-MH-A857	0.98	-1.31	0.98
TCGA-B9-4113	0.97	-1.03	0.97
TCGA-KV-A6GE	0.97	-0.9	0.97
TCGA-GL-A9DE	0.96	-1.23	0.96
TCGA-GL-A9DD	0.94	-0.96	0.94
TCGA-Y8-A8RY	0.94	-0.94	0.94
TCGA-2Z-A9JT	0.93	-0.76	0.93
TCGA-IA-A83T	0.93	-0.65	0.93
TCGA-BQ-5884	0.92	-1.03	0.92
TCGA-B1-A655	0.9	-1.19	0.9
TCGA-DW-7841	0.9	-0.8	0.9
TCGA-A4-A48D	0.82	-0.92	0.82
TCGA-Y8-A8S1	-0.48	-0.48	0.94
TCGA-4A-A93Y	-0.55	-0.55	1.07
TCGA-BQ-5889	-0.59	-0.59	1.27
TCGA-P4-A5ED	-0.65	-0.65	0.84
TCGA-B1-5398	-0.68	-0.68	0.66
TCGA-KV-A6GD	-0.77	-0.77	0.99
TCGA-2Z-A9J5	-0.84	-0.84	0.95
TCGA-G7-6796	-0.86	-0.86	1.19
TCGA-B3-8121	-0.9	-0.9	1.04
TCGA-PJ-A5Z8	-0.95	-0.95	1.2
TCGA-BQ-5892	-0.96	-0.96	1.15
TCGA-DW-7834	-0.97	-0.97	1.18
TCGA-AL-A5DJ	-1	-1	1.42
TCGA-A4-7585	-1.04	-1.04	1.03
TCGA-2Z-A9JI	-1.05	-1.05	1.09
TCGA-A4-7915	-1.24	-1.24	1.69
